# Supplementary material for: Research features between Urology and Nephrology authors in articles regarding UTI related to CKD, HD, PD, and renal transplantation
Source: PubMed Central journal article supplement — Medicine (Baltimore). 2022 Oct 14;101(41):e31052. doi: 10.1097/MD.0000000000031052 (PMC9575707; doi:10.1097/md.0000000000031052), 2022-10-14
Supplement: medi-101-e31052-s003.pdf [file medi-101-e31052-s003.pdf]

# How to draw the Sankey diagram and forest plot

## A. The Sankey diagram

1. Step 1: getting data from the link

Download 100-top cited articles for the two journals in this study at

<http://www.healthup.org.tw/html100/spine2journals.htm>

|   | A        | B | C    | D       | E                 | F                     | G                 | H                        | I   |
|---|----------|---|------|---------|-------------------|-----------------------|-------------------|--------------------------|-----|
| 1 | Citation |   | Year | Country | Category          | Journal               | Type              | PMID                     |     |
| 2 | 374      |   | 2011 | U.S     | F5.Physiology     | Spine J               | Journal Article   | <a href="#">21729796</a> | 374 |
| 3 | 213      |   | 2012 | U.S     | F1.Pain&Prognosis | Spine (Phila Pa 1976) | Journal Article   | <a href="#">21311399</a> | 213 |
| 4 | 172      |   | 2012 | U.S     | F2.Statist &Data  | Spine (Phila Pa 1976) | Comparative Study | <a href="#">22045006</a> | 172 |
| 5 | 163      |   | 2012 | U.S     | F1.Pain&Prognosis | Spine (Phila Pa 1976) | Journal Article   | <a href="#">22146287</a> | 163 |
| 6 | 138      |   | 2013 | U.S     | F5.Physiology     | Spine (Phila Pa 1976) | Evaluation Study  | <a href="#">23970107</a> | 138 |
| 7 | 135      |   | 2013 | U.S     | F2.Statist &Data  | Spine (Phila Pa 1976) | Journal Article   | <a href="#">23722572</a> | 135 |
| 8 | 120      |   | 2011 | U.S     | F1.Pain&Prognosis | Spine (Phila Pa 1976) | Journal Article   | <a href="#">21952190</a> | 120 |

2. Step 2: SNA approach to get the element counts and relations between elements

|    | A  | B           | C   | D        | E | F             | G           | H           |
|----|----|-------------|-----|----------|---|---------------|-------------|-------------|
| 1  |    |             |     |          | 1 |               |             |             |
| 2  | C1 | 2011        | 49  | 21729796 | 1 |               | 2011        | U.S         |
| 3  | C1 | 2013        | 42  | 21311399 | 1 |               | U.S         | F5.Physiol  |
| 4  | C1 | 2012        | 40  | 22045006 | 1 |               | F5.Physiol  | Spine J     |
| 5  | C1 | 2014        | 34  | 22146287 | 1 |               | Spine J     | Journal Art |
| 6  | C1 | 2015        | 24  | 23970107 | 1 |               | Journal Art | 21729796    |
| 7  | C1 | 2016        | 8   | 23722572 |   | citation      | 2012        | U.S         |
| 8  | C1 | 2017        | 3   | 21952190 |   |               | U.S         | F1.Pain&P   |
| 9  | C2 | U.S         | 107 | 21192221 |   |               | F1.Pain&P   | Spine (Phil |
| 10 | C2 | Japan       | 11  | 25839387 |   | Count only    | Spine (Phil | Journal Art |
| 11 | C2 | South Korea | 11  | 23537454 |   |               | Journal Art | 21311399    |
| 12 | C2 | Netherland  | 9   | 24113358 |   |               | U.S         | F2.Statist& |
| 13 | C2 | China       | 8   | 26208232 | 1 |               | F2.Statist& | Spine (Phil |
| 14 | C2 | Canada      | 7   | 24412416 |   | CSTR(number)  | Spine (Phil | Comparativ  |
| 15 | C2 | U.K         | 7   | 23369494 |   |               | Comparativ  | 22045006    |
| 16 | C2 | Australia   | 7   | 24239490 | 1 |               | Journal Art | 22146287    |
| 17 | C2 | Germany     | 4   | 23830297 |   |               | 2013        | U.S         |
| 18 | C2 | Sweden      | 3   | 23369495 |   | x-index Top 5 | F5.Physiol  | Spine (Phil |
| 19 | C3 | F2.Statist& | 74  | 24412032 |   |               | Spine (Phil | Evaluation  |
| 20 | C3 | F5.Physiol  | 46  | 21192288 |   |               | Evaluation  | 23970107    |

|    | A           | B           | C    | D       | E       | F                         | G            | H    | I        | J  | K    | L  | M           | N   | O       |    |
|----|-------------|-------------|------|---------|---------|---------------------------|--------------|------|----------|----|------|----|-------------|-----|---------|----|
| 4  | F5.Physiol  | Spine J     | 12   | #000000 | C3      |                           |              |      |          | C3 | 0.77 | C1 | 2012        | 40  | #ffcc00 | C1 |
| 5  | Spine J     | Journal Art | 76   | 31      | #000000 | C4                        |              |      |          |    |      | C1 | 2014        | 34  | #80ff00 | C1 |
| 6  | Journal Art | 21729796    | 1    | #ff0000 | C5      |                           |              |      |          |    |      | C1 | 2015        | 24  | #993300 | C1 |
| 7  | 2012        | U.S         | 7    | #000000 | C1      |                           |              |      |          |    |      | C1 | 2016        | 8   | #A2B2E2 | C1 |
| 8  | U.S         | F1.Pain&P   | 2    | #000000 | C2      |                           |              |      |          |    |      | C1 | 2017        | 3   | #5e8437 | C1 |
| 9  | F1.Pain&P   | Spine (Phil | 6    | #000000 | C3      |                           |              |      |          |    | AAC  | C2 | U.S         | 107 | #8A2BE2 | C2 |
| 10 | Spine (Phil | Journal Art | 73   | #ff0000 | C4      | To generate Unknowns edge |              |      |          |    |      | C2 | Japan       | 11  | #DEB887 | C2 |
| 11 | Journal Art | 21311399    | 1    | #000000 | C5      |                           |              |      |          |    |      | C2 | South Korea | 11  | #00ff00 | C2 |
| 12 | U.S         | F2.Statist& | 6    | #ff0000 | C1      |                           |              |      |          |    |      | C2 | Netherland  | 9   | #FBF5EF | C2 |
| 13 | F2.Statist& | Spine (Phil | 29   | #ff0000 | C1      | 1 Unknown                 | 1 Known flow |      |          |    |      | C2 | China       | 8   | #0000ff | C2 |
| 14 | Spine (Phil | Comparativ  | 5    | #000000 | C4      |                           |              |      |          |    |      | C2 | Canada      | 7   | #A2B2E2 | C2 |
| 15 | Comparativ  | 22045006    | 1    | #000000 | C7      |                           |              |      |          |    |      | C2 | U.K         | 7   | #A52A2A | C2 |
| 16 | Journal Art | 22146287    | 1    | #000000 | C2      | 2 Check                   | Edge color   |      |          |    |      | C2 | Australia   | 7   | #DEB887 | C2 |
| 17 | 2013        | U.S         | 11   | #000000 | C1      |                           |              |      |          |    |      | C2 | Germany     | 4   | #5F9EAD | C2 |
| 18 | F5.Physiol  | Spine (Phil | 16   | #000000 | C3      |                           |              |      |          |    |      | C2 | Sweden      | 3   | #7FFF00 | C2 |
| 19 | Spine (Phil | Evaluation  | 1    | #000000 | C1      | 3 Goto DD2                | Chisquare c  |      |          |    |      | C3 | F2.Statist& | 74  | #D2691E | C3 |
| 20 | Evaluation  | 23970107    | 1    | #000000 | C1      |                           |              |      |          |    |      | C3 | F5.Physiol  | 46  | #FF7F50 | C3 |
| 21 | Journal Art | 23722572    | 1    | #000000 | C5      |                           |              | 1.00 |          |    |      | C3 | F3.Spine&P  | 33  | #6495ED | C3 |
| 22 | Journal Art | 21952190    | 1    | #000000 | C5      |                           |              | 1.00 | 23537454 |    |      | C3 | F1.Pain&P   | 29  | #FFB6C1 | C3 |
| 23 | Journal Art | 21192221    | 1    | #000000 | C5      |                           |              | 1.00 |          |    |      | C3 | F4.Physio   | 18  | #DC143C | C3 |
| 24 | 2015        | Canada      | 1    | #000000 | C1      |                           |              |      |          |    |      | C4 | Spine J     | 100 | #00FFFF | C4 |
| 25 | Canada      | F5.Physiol  | 1.16 | #000000 | C2      |                           |              |      |          |    |      | C4 | Spine (Phil | 100 | #00008B | C4 |
| 26 | Journal Art | 25839387    | 1    | #000000 | C5      |                           |              |      |          |    |      | C5 | Journal Art | 160 | #008B8B | C5 |
| 27 | F1.Pain&P   | Spine J     | 18   | #000000 | C3      |                           |              |      |          |    |      | C5 | Comparativ  | 22  | #B8860B | C5 |
| 28 | Journal Art | 23537454    | 1    | #000000 | C5      |                           |              |      |          |    |      | C5 | Clinical Tr | 7   | #A9A9A9 | C5 |
| 29 | 2015        | U.S         | 11   | #000000 | C1      |                           |              |      |          |    |      | C5 | Evaluation  | 4   | #A9A9A9 | C5 |

Excel module to draw the Sankey

To arrange data as the form below:

- Step 3: to draw the Sankey diagram

|    | A                         | B | C |
|----|---------------------------|---|---|
| 1  |                           |   |   |
| 2  | . [0.0001] C0             |   |   |
| 3  | C0 [0.0001] C1            |   |   |
| 4  | . [49] 2011               |   |   |
| 5  | . [42] 2013               |   |   |
| 6  | . [40] 2012               |   |   |
| 7  | . [34] 2014               |   |   |
| 8  | . [24] 2015               |   |   |
| 9  | . [8] 2016                |   |   |
| 10 | . [3] 2017                |   |   |
| 11 | 2013 [23] F2.Statist&Date |   |   |
| 12 | 2012 [17] F2.Statist&Date |   |   |
| 13 | 2014 [9] F2.Statist&Date  |   |   |
| 14 | 2015 [12] F2.Statist&Date |   |   |
| 15 | 2016 [4] F2.Statist&Date  |   |   |
| 16 | 2017 [2] F2.Statist&Date  |   |   |

Codes generated to fit the requirement of Sankey format at

<https://sankeymatic.com/>

- Step 4: Copy and Paste them onto the Sankey maker

<https://sankeymatic.com/build/>

**Inputs:**

- U.S. #5e8437
- Australia #8A2BE2
- Germany #0EB887
- Sweden #00F80
- F2.Statist&Data #009933
- F5.Physiology #fcc00
- F3.Spine&Surgery #f0086
- F1.Pain&Prognosis #80ff00
- F4.Phiopathology #993300
- Spine J #009933
- Spine (Phila Pa 1978) #fcc00
- Journal Article #009933
- Comparative Study #fcc00
- Clinical Trial #f0086
- Evaluation Study #80ff00
- Case Reports #993300
- Guideline #8A2BE2
- Congress #5e8437
- Comment #8A2BE2

Visit the [Manual](#) for a detailed guide

**Nodes:**

Width: 39 Spacing: 0 Max

Border: 0 Opacity: 0 1

**Default Node Colors:**

Use  one color: [ ] or a Theme:

- Categories
- Tableau10
- Dark
- Varied

**Flows:**

Opacity: 0 1 Curviness: 1 ( )

**Default Flow Colors:**

Use  one color: [ ] or colors from:

- each flow's Source
- each flow's Target
- the outermost nodes (flowing in)

**Diagram Size & Background:**

Width: 2600 Height: 1800 Background Color: [ ]  Transparent

Margins: Left 12 Right 12 Top 18 Bot 20

Move Nodes by dragging. Double-click a Node to reset, or: [Reset all moved Nodes](#)

"U.S [0] F5.Physiology #000000": Amounts must be greater than 0.

"2011 [0] Sweden #000000": Amounts must be greater than 0.

"2016 [0] China #000000": Amounts must be greater than 0.

"Spine J [0] C5 #ffffff": Amounts must be greater than 0.

122.04

2011: 49

U.S: 107

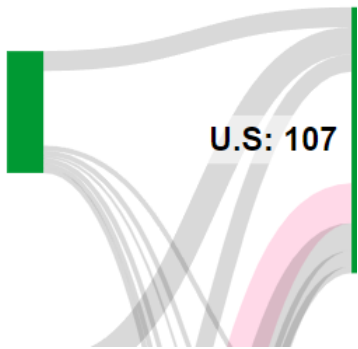

Download it

Prefix = [ ] Suffix = [ ]

Number Format: 1,000,000.00

**Layout Options:**

Note: these options only apply to diagrams with 3 or more columns of nodes:

Place all flow origins at the left edge  Place all flow endpoints at the right edge

Reverse the graph (flow right-to-left)

Diagram Scale = 0.6981 per pixel (200.0001/286.5px)

For fair comparisons between diagrams:

1) Use the same units for each, and 2) Make their Diagram Scales match as closely as possible.

**Export Diagram:**

Once you are satisfied with your diagram, you can export it as an image or as vector code (SVG).

**PNG Image:**

Size: 2x - Medium

[Export 3200 x 1200 PNG](#)

Dimensions for IMG tag:

```
<img width="1600" height="600" ... />
```

**SVG Code...**

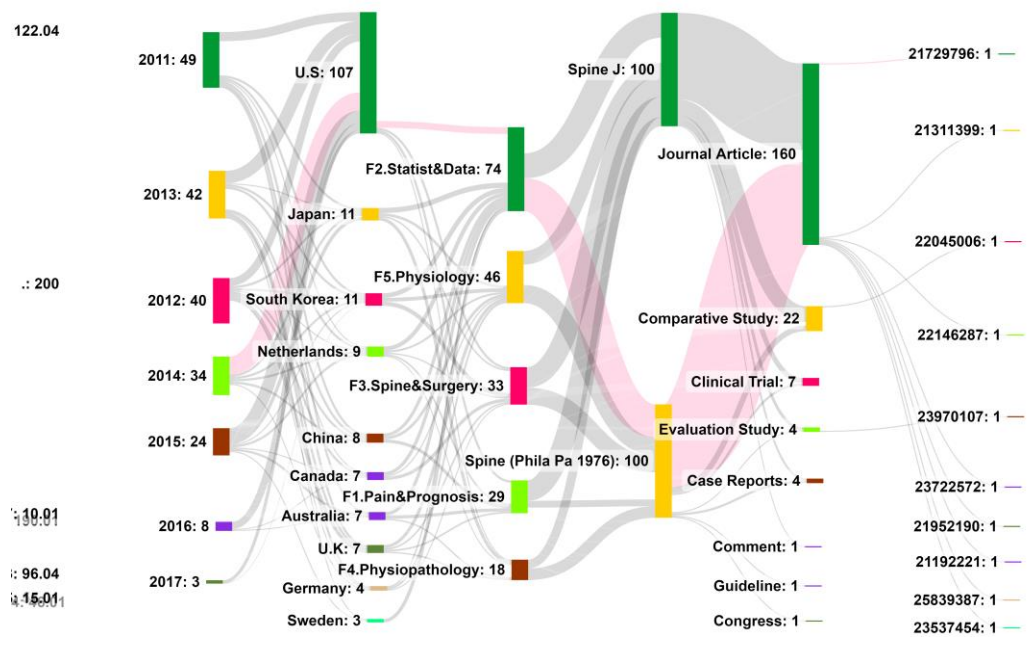

# Top 10 dominant elements in entities

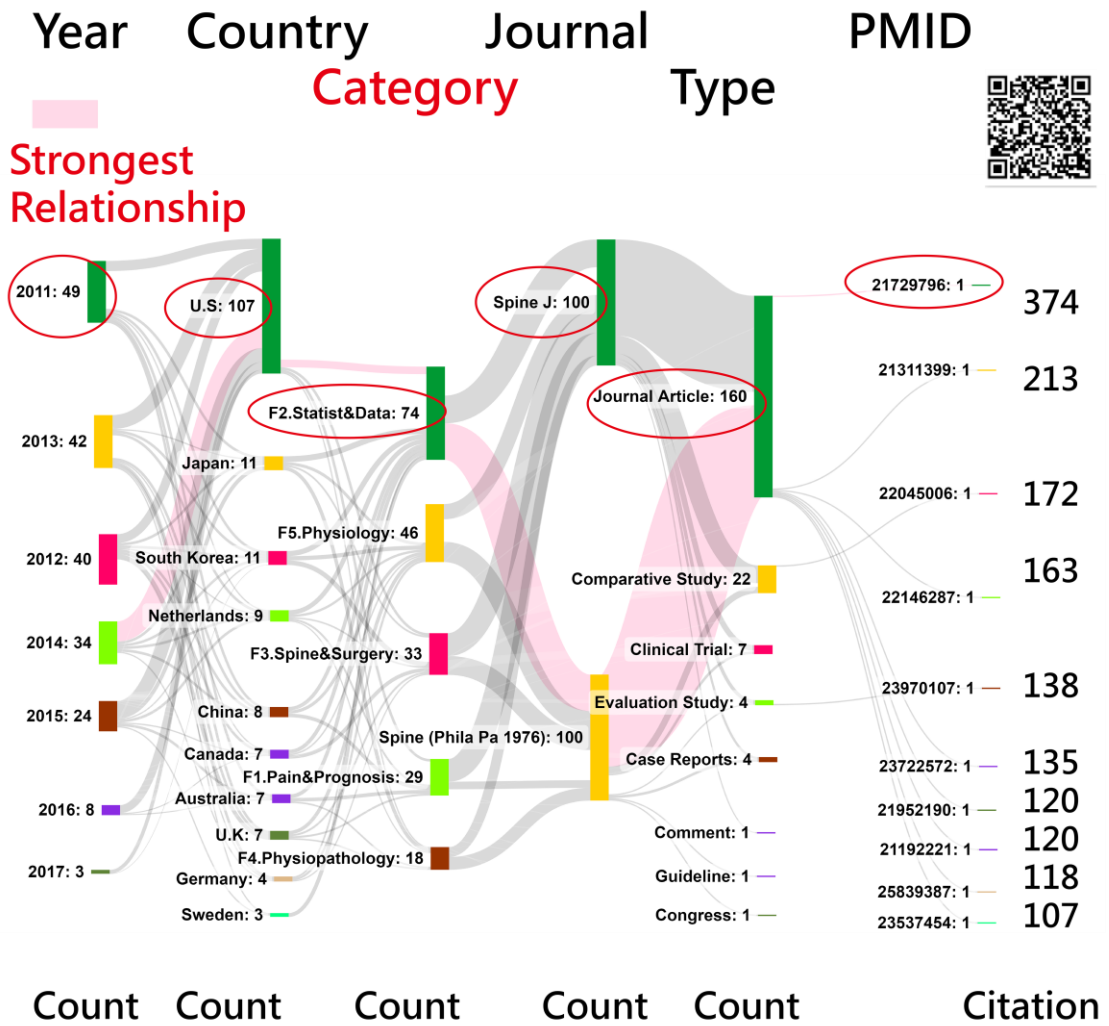

If data were pasted on the website at <http://www.healthup.org.tw/kpiall/forestplot.asp>, the Sankey can be drawn in this way below:

responses(rows for person and columns for items)

```
11 2011 49
11 2013 42
11 2012 40
11 2014 34
11 2015 24
11 2016 8
11 2017 3
13 F2.Statist&Date 74
13 F5.Physiology 46
13 F3.Spine&Surgery 33
13 F1.Pain&Prognosis 29
13 F4.Phiopathology 18
15 U.S 107
15 Japan 11
15 South Korea 11
15 Netherlands 9
```

For the format from differcne sources, see below examples...

```
2011 F5.Physiology 26.00000
F5.Physiology U.S 50.00000
U.S Spine J 122.00000
Spine J Journal Article 180.00000
Journal Article 21729796 2.00000
2012 F1.Pain&Prognosis 12.00000
F1.Pain&Prognosis U.S 44.00000
U.S Spine (Phila Pa 1976) 92.00000
Spine (Phila Pa 1976) Journal Article 140.00000
Journal Article 21311399 2.00000
2012 F2.Statist&Date 30.00000
F2.Statist&Date U.S 82.00000
Spine (Phila Pa 1976) Comparative Study 38.00000
Comparative Study 22045006 2.00000
Journal Article 22146287 2.00000
2013 F5.Physiology 16.00000
```

Copy from MS Excel and Paste them onto the boxes: one for data, another for sample size, respectively. The first plot immediately appears on Google Maps.

Forest Source

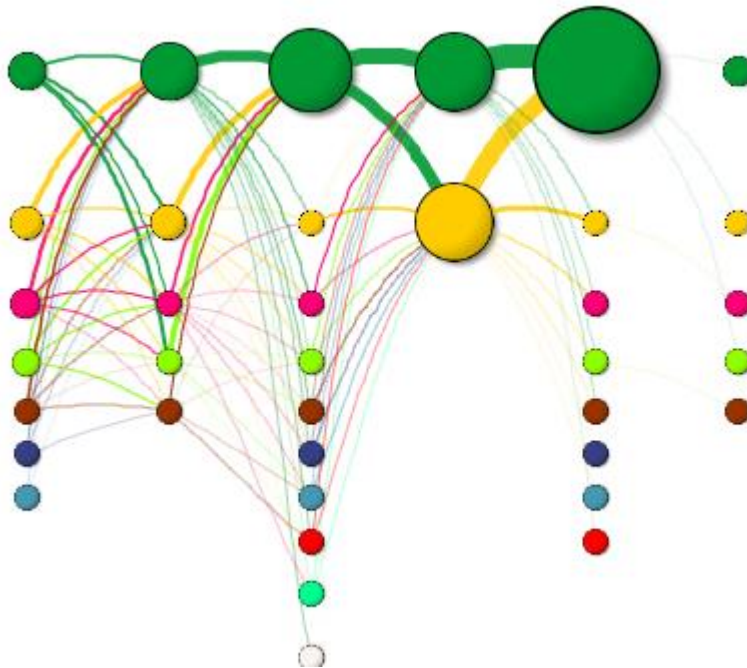

## B. The Forest plot <http://www.healthup.org.tw/kpiall/forestplot.asp>

← → ↻ 🏠 ⚠ 不安全 | healthup.org.tw/kpiall/forestplot.asp

|        |    |    |    |    |
|--------|----|----|----|----|
| Item01 | 94 | 22 | 92 | 20 |
| item02 | 98 | 21 | 92 | 22 |
| Item03 | 98 | 28 | 88 | 26 |
| Item04 | 94 | 19 | 82 | 17 |
| Item05 | 98 | 21 | 88 | 22 |
| Item06 | 96 | 21 | 92 | 22 |

For the format from differcne sources, see below examples...

60 60  
65 65  
40 40  
200 200  
50 45  
85 85

Copy from MS Excel and Paste them onto the boxes: one for data, another for sample size, respectively  
Forest plot immediately appears on Google Maps.

Forest Source

Clear

Data1:

|        |    |    |    |    |
|--------|----|----|----|----|
| Item01 | 94 | 22 | 92 | 20 |
| item02 | 98 | 21 | 92 | 22 |
| Item03 | 98 | 28 | 88 | 26 |
| Item04 | 94 | 19 | 82 | 17 |
| Item05 | 98 | 21 | 88 | 22 |
| Item06 | 96 | 21 | 92 | 22 |

Data2 for sample:

60 60  
65 65  
40 40  
200 200  
50 45  
85 85



Data were pasted onto the website.

the first plot immediately appears on Google Maps.

Forest Source

Examples for use in Forest plot

SE adjustment(9:

Item01,0.09,0.18,-0.266,0.446,60,0.52,0.606,12.43  
 item02,0.28,0.18,-0.063,0.623,65,1.58,0.12,13.34  
 Item03,0.37,0.22,-0.068,0.808,40,1.64,0.11,8.21  
 Item04,0.66,0.1,0.459,0.861,200,6.48,0.001,38.95  
 Item05,0.46,0.21,0.055,0.865,45,2.24,0.03,9.6  
 Item06,0.19,0.15,-0.11,0.49,85,1.21,0.232,17.48  
 Overall,0.413,0.06,0.288,0.538,994,6.454,0.001,100

Group if necessary from 1 to n at least 5 observed number for each group)

EffectSize:  Scale(>0;eg 0.9 or 1)  Toward the right(>0)  Mul

Extended to Two sides(<>0)  Extreme=

To confirm the parameters as shown below and click on the submit icon.

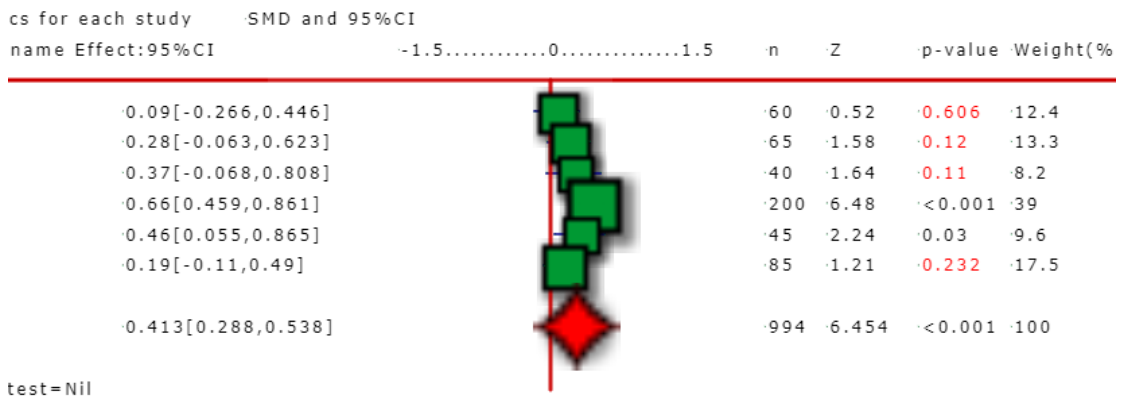

Appendices:

# Word cloud tutorial in Excel

<https://help.xlstat.com/6698-word-cloud-tutorial-excel>

# Latent Semantics Analysis (LSA) in Excel tutorial

<https://help.xlstat.com/6470-latent-semantic-analysis-lsa-excel-tutorial>

## k-means clustering in Excel tutorial

### Text Mining<sup>5</sup>

- [Latent Semantics Analysis \(LSA\) in Excel tutorial](#)
- [Cleaning text data in Excel tutorial](#)
- [Convert text data to lower or upper case in Excel](#)
- [Word cloud tutorial in Excel](#)
- [Feature extraction tutorial in Excel](#)
  - <https://help.xlstat.com/tutorial-guides/text-mining>

### Feature extraction tutorial in Excel

- <https://help.xlstat.com/6751-feature-extraction-tutorial-excel>

|    | A        | B       | C      | D      | E      | F        | G    | H        |
|----|----------|---------|--------|--------|--------|----------|------|----------|
| 1  | PMID     | surgeri | method | effect | advers | patholog | imag | diagnost |
| 2  | 26689395 | 1       | 0      | 0      | 0      | 0        | 0    | 0        |
| 3  | 26555839 | 2       | 2      | 0      | 0      | 0        | 0    | 0        |
| 4  | 26335676 | 2       | 0      | 0      | 0      | 0        | 0    | 0        |
| 5  | 26208232 | 0       | 0      | 0      | 0      | 0        | 0    | 0        |
| 6  | 26020847 | 3       | 0      | 0      | 0      | 0        | 0    | 0        |
| 7  | 25955086 | 4       | 2      | 0      | 0      | 0        | 0    | 0        |
| 8  | 25893353 | 0       | 0      | 0      | 0      | 2        | 1    | 0        |
| 9  | 25839387 | 0       | 0      | 0      | 0      | 0        | 0    | 0        |
| 10 | 25394317 | 3       | 2      | 0      | 0      | 0        | 0    | 0        |
| 11 | 24480958 | 4       | 0      | 0      | 0      | 0        | 0    | 0        |
| 12 | 24270931 | 0       | 0      | 0      | 0      | 0        | 4    | 4        |
| 13 | 24253796 | 0       | 0      | 0      | 0      | 0        | 0    | 0        |

| BF   | BG    | BH       | BI       | BJ       | BK       | BL       |
|------|-------|----------|----------|----------|----------|----------|
| view | class | F1       | F2       | F3       | F4       | F5       |
| 0    | 2     | -0.32101 | 0.03681  | -0.0707  | 2.33759  | -0.09017 |
| 0    | 5     | -0.39668 | -0.28528 | -0.39899 | -0.22724 | -0.33354 |
| 0    | 5     | -0.4033  | -0.19003 | -0.2521  | -0.27256 | -0.29651 |
| 0    | 2     | -0.15271 | -0.09869 | -0.57433 | -0.12948 | -0.32873 |
| 0    | 5     | -0.42683 | 0.1435   | 1.70921  | 2.36492  | -0.47225 |
| 0    | 5     | -0.60801 | -0.3051  | -0.21353 | -0.44124 | -0.49399 |
| 0    | 2     | -0.09026 | -0.26332 | -0.71941 | -0.23679 | 0.06833  |
| 0    | 2     | -0.21022 | -0.46192 | -0.23579 | -0.84111 | 0.33493  |
| 0    | 5     | -0.44818 | -0.30172 | -0.31189 | -0.2248  | -0.33361 |
| 0    | 5     | -0.35832 | -0.18718 | -0.18751 | -0.06884 | -0.09843 |
| 0    | 4     | -0.5094  | -0.37439 | -1.29245 | 0.43195  | -0.36751 |
| 0    | 2     | 0.59565  | -0.00099 | -0.69276 | -0.18936 | -0.6921  |
| 0    | 5     | -0.326   | -0.21978 | -0.38035 | -0.15048 | -0.21591 |
| 0    | 2     | -0.28894 | -0.22263 | -0.77322 | 0.0557   | -0.4598  |
| 0    | 2     | -0.20421 | -0.11514 | -0.48723 | -0.12704 | -0.32881 |
| 0    | 4     | -0.5094  | -0.37439 | -1.29245 | 0.43195  | -0.36751 |

Fig. Results by EFA

EFA in Excel

<https://www.real-statistics.com/multivariate-statistics/factor-analysis/>

|    | A         | B     | C     | D     | E |
|----|-----------|-------|-------|-------|---|
| 4  | low       | 0.935 |       |       |   |
| 5  | back      | 0.935 |       |       |   |
| 6  | pain      | 0.876 |       |       |   |
| 7  | prognosi  | 0.785 |       |       |   |
| 8  | psycholog | 0.599 |       |       |   |
| 9  | factor    | 0.507 |       |       |   |
| 10 | review    | 0.301 |       |       |   |
| 11 | model     | 0.289 |       |       |   |
| 12 | patholog  | 0.136 |       |       |   |
| 13 | data      |       | 0.899 |       |   |
| 14 | statist   |       | 0.899 |       |   |
| 15 | numer     |       | 0.899 |       |   |
| 16 | econom    |       | 0.546 |       |   |
| 17 | cost      |       | 0.526 |       |   |
| 18 | health    |       | 0.368 |       |   |
| 19 | trend     |       | 0.154 |       |   |
| 20 | spine     |       |       | 0.531 |   |
| 21 | spinal    |       |       | 0.479 |   |
| 22 | fusion    |       |       | 0.478 |   |

|       | BG | BH       | BI       | BJ       | BK       | BL       |
|-------|----|----------|----------|----------|----------|----------|
| class | F1 | F2       | F3       | F4       | F5       |          |
|       | 2  | -0.32101 | 0.03681  | -0.0707  | 2.33759  | -0.09017 |
|       | 5  | -0.39668 | -0.28528 | -0.39899 | -0.22724 | -0.33354 |
|       | 5  | -0.4033  | -0.19003 | -0.2521  | -0.27256 | -0.29651 |
|       | 2  | -0.15271 | -0.09869 | -0.57433 | -0.12948 | -0.32873 |
|       | 5  | -0.42683 | 0.1435   | 1.70921  | 2.36492  | -0.47225 |
|       | 5  | -0.60801 | -0.3051  | -0.21353 | -0.44124 | -0.49399 |
|       | 2  | -0.09026 | -0.26332 | -0.71941 | -0.23679 | 0.06833  |
|       | 2  | -0.21022 | -0.46192 | -0.23579 | -0.84111 | 0.33493  |
|       | 5  | -0.44818 | -0.30172 | -0.31189 | -0.2248  | -0.33361 |
|       | 5  | -0.35832 | -0.18718 | -0.18751 | -0.06884 | -0.09843 |
|       | 4  | -0.5094  | -0.37439 | -1.29245 | 0.43195  | -0.36751 |
|       | 2  | 0.59565  | -0.00099 | -0.69276 | -0.18936 | -0.6921  |
|       | 5  | -0.326   | -0.21978 | -0.38035 | -0.15048 | -0.21591 |

Using the factor scores to perform the k-means clustering and select the number of clusters to five equal to the factor number.

The document related to the cluster can be obtained.

## To classify articles into subject categories:

1. dataset

{PMID, MeSh terms, Keywords} using SNA and determine cluster number=5 that will be clustered as below:

That is, each article can be classified into each category using the SNA.

### **F3.Spine&Surgery(n=33)**

### **F2.Statist&Date(n=74)**

### **F5.Physiology (n=46)**

### **F4.Physiopathology(n=18)**

### **F1.Pain&Prognosis(n=29)**

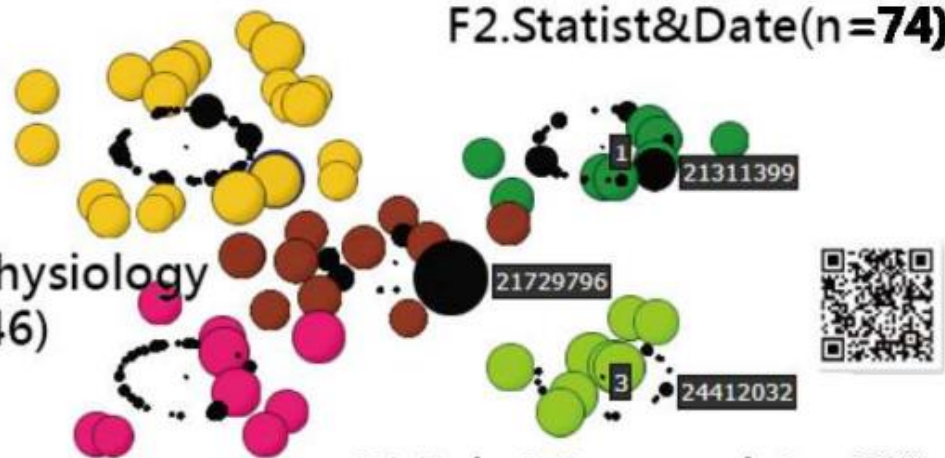

## 2. factor scores in two journals:

Because each articles with each factor score have been known, the SMD can be compared using the forest plot.

Similarly, the counts in each category for each journal can be obtained to perform the ChiSQ test for examining the count distributions equally across categories.
